# Supplementary material for: Photocatalytic decarboxylation of diacids for the initiation of free radical polymerization
Source: Royal Society of Chemistry journal article supplement (doi:10.1039/c7pp00013h), 2017-06-20
Supplement: c7pp00013h1.pdf [file c7pp00013h1.pdf]

## Supplementary material

### Photocatalytic decarboxylation of diacids for initiating free radical polymerization

Wanfeng Liao and Xiuyuan Ni\*

State Key Laboratory of Molecular Engineering of Polymer, Department of Macromolecular Science, Fudan University, Shanghai 200433, China

\*Corresponding author. Tel: +86-21-65640982 Fax: +86-21-65640293

Corresponding e-mail: xyni@fudan.edu.cn

#### S1. $^{13}\text{C}$ -NMR analysis of PVAc obtained by using $^{13}\text{C}$ labeled acetic acid in bulk

Fig S1 shows the  $^{13}\text{C}$ -NMR spectrum of PVAc obtained in bulk by adding  $0.152\text{ mol L}^{-1}$  of  $2\text{-}^{13}\text{C}$  acetic acid. It is clear to see that the spectrum accords well with that of normal PVAc except for a new chemical shift peak at 9.49 ppm. The chemical shifts of carbon atoms are assigned in Table S1.

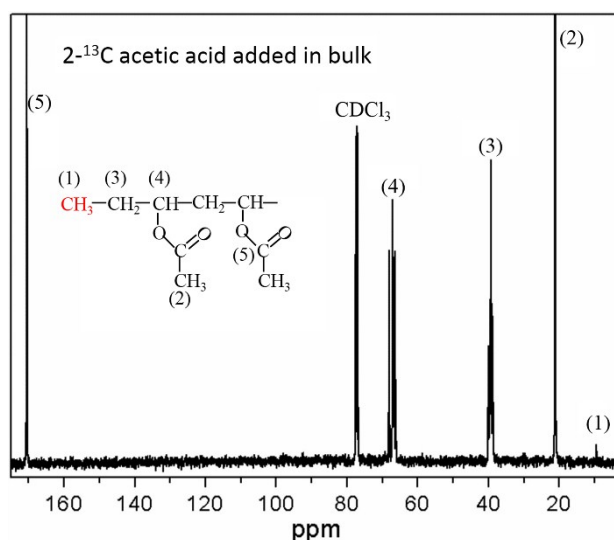

**Fig S1.**  $^{13}\text{C}$ -NMR spectrum of PVAc obtained in bulk by adding  $0.152\text{ mol L}^{-1}$  of  $2\text{-}^{13}\text{C}$  acetic acid. The amount of  $\text{TiO}_2$  nanoparticles is  $2\text{ g L}^{-1}$ .

According to the Lindeman–Adams formula<sup>1</sup>, the peak at 9.49 ppm is assigned

to the ultimate methyl group, which is derived from photodecarboxylation of the  $^{13}\text{C}$  labelled acetic acid.

$$\delta_c(k) = \delta_c(k, \text{RH}) + \sum_i Zk_i(R_i) \quad (1)$$

where  $\delta_c(k, \text{RH})$  is the increment for the unsubstituted carbon atom at  $k$  position ( $k = \alpha, \beta, \gamma, \delta$ ).  $Zk_i(R_i)$  is the increment due to the substitution of  $R_i$ .  $\delta_c(k, \text{RH})$  is described by

$$\delta_c(k) = A_n + \sum_{m=0}^2 N_m^\alpha \alpha_{nm} + N^\gamma \gamma_n + N^\delta \delta_n \quad (2)$$

where the increments are easily found in the database for various carbon atoms. As for carbon (1) in the chain sequences pictured inside Fig. S1,  $A_n = 6.86$ ,  $N_m^\alpha = 1$ ,  $N^\gamma = 1$ ,  $N^\delta = 1$ ,  $\alpha_{nm} = 9.56$ ,  $\gamma_n = -2.99$ ,  $\delta_n = 0.49$ , we thus obtain  $\delta_c(k, \text{RH}) = 13.86$  ppm, while  $Zk_i(R_i) = -4$  ppm due to the substitution of acetate group at  $\beta$  position. Consequently, the chemical shift for carbon (1) is predicted to locate at 9.86 ppm.

**Table S1.** Assignment of the  $^{13}\text{C}$ -NMR peaks of the resultant polyvinyl acetate in  $\text{CDCl}_3$  solvent by adding  $0.152 \text{ mol L}^{-1}$  of  $2\text{-}^{13}\text{C}$  acetic acid in bulk.

| Peak | Prediction(ppm) | Spectrum(ppm) | Assignment                     |
|------|-----------------|---------------|--------------------------------|
| (1)  | 9.86            | 9.49          | Ultimate $\text{CH}_3$         |
| (2)  | 22.50           | 21.05         | Acetate $\text{CH}_3$          |
| (3)  | 39.86           | 38.72-39.97   | Main-chain $\text{CH}_2$       |
| (4)  | 66.90           | 66.09-68.08   | Main-chain CH                  |
| (5)  | 170.0           | 170.47        | Main-chain $\text{C}=\text{O}$ |

## S2. Characterization of the PVAc obtained by adding malonic acid in bulk

Fig S2 shows the  $^{13}\text{C}$ -NMR spectrum of PVAc obtained by using malonic acid, which is the same to the  $^{13}\text{C}$ -NMR spectrum of the normal PVAc. The result indicates that no chemical shift peak of the terminal group can be detected due to the fraction of the terminal carbon in the total-chain carbons is too small.

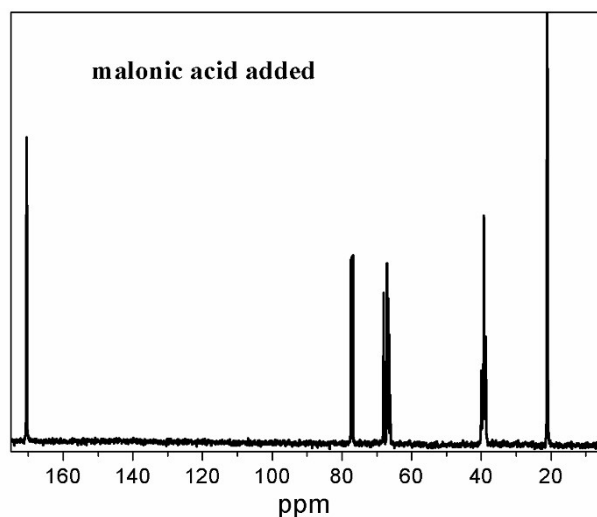

**Fig S2.** The  $^{13}\text{C}$ -NMR spectrum of PVAc obtained in aqueous medium by adding  $0.01 \text{ mol L}^{-1}$  of malonic acid.

### **S3. The structural characterization of products obtained in aqueous medium by FTIR**

Fig S3 exhibits the FTIR spectra of products obtained in aqueous. It reveals that by adding no acid, the FTIR spectrum of products is almost the same as that of pure  $\text{TiO}_2$  nanoparticles<sup>2</sup>. In comparison, by using diacids (from malonic acid to adipic acid), the characteristic peaks of PVAc are observed<sup>3</sup>. It can be concluded that both carboxylic diacid and  $\text{TiO}_2$  nanoparticles are essential to initiate the photo polymerization of VAc.

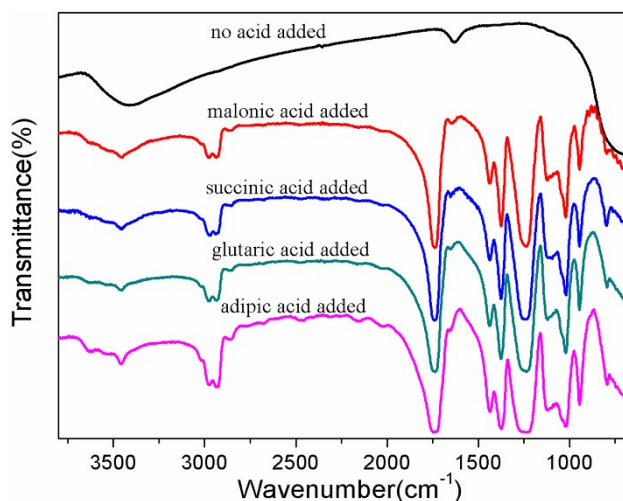

**Fig S3.** FTIR spectra of  $\text{TiO}_2$  and products obtained by adding different acid in VAc aqueous solution.

### **S4. The TGA analysis of products obtained in aqueous medium**

Fig S4 shows the TGA curves of products obtained by adding 5.5 mmol L<sup>-1</sup> of diacids in water. After being heated to 700 °C, the products obtained by adding no acid showed little weight loss, which may be attributed to the water adsorbed on TiO<sub>2</sub>. On the contrary, the products obtained by adding malonic acid, succinic acid, glutaric acid or adipic acid exhibit significant weight loss. From the DTG curves, the peak around 340 °C refers to the cleavage of acetate group and the weight loss after 400 °C is resulted from the breakdown of the PVAc C-C backbones<sup>4</sup>. Therefore, it is infeasible for TiO<sub>2</sub> nanoparticles to initiate the photopolymerization of VAc in aqueous without diacid. Similarly, in the case of bulk reaction, almost no PVAc was observed by adding no diacid into the reaction mixture containing TiO<sub>2</sub> nanoparticles.

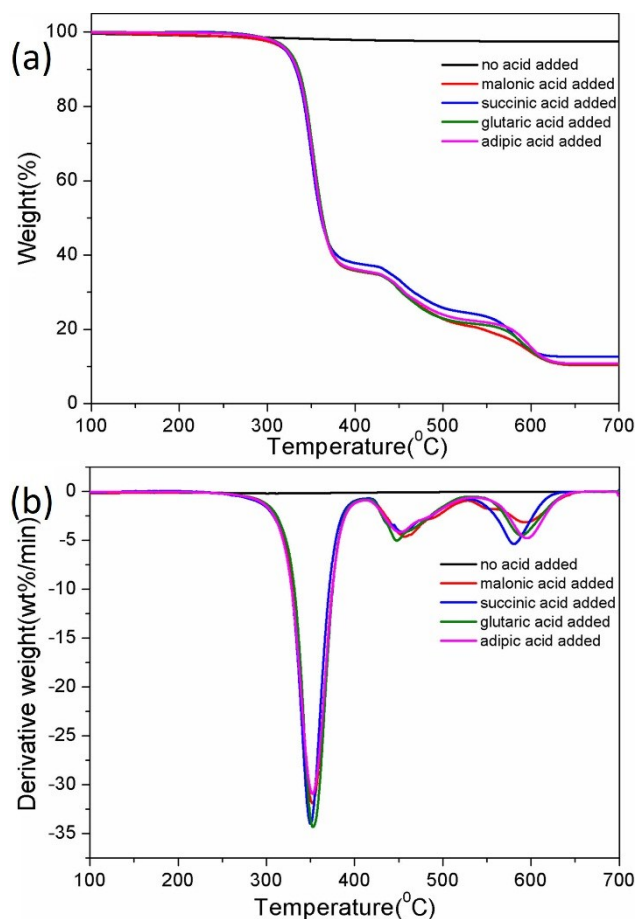

**Fig S4.** TGA (a) and DTG (b) curves of products obtained by adding different dicarboxylic acids in VAc aqueous solution. The amount of TiO<sub>2</sub> nanoparticles is 1 g L<sup>-1</sup>.

## References:

- 1 E. Breitmaier, W. Voelter, <sup>13</sup>C-NMR Spectroscopy: methods and applications in organic chemistry, Verlag Chemie, Weinheim, 1978.
- 2 B. Erdem, R.A. Hunsicker, G.W. Simmons, E.D. Sudol, V.L. Dimonie, M.S. El-Aasser, Langmuir, 2001, 17, 2664–2669.
- 3 L. Sharma, T. Kimura, Polymers for Advanced Technologies, 2003, 14, 392–399.
- 4 Z. Weng, X. Ni, D. Yang, J. Wang, W. Chen, Journal of Photochemistry and Photobiology A: Chemistry, 2009, 201, 151-156.
